# Supplementary material for: Efficiency of different strategies to mitigate ascertainment bias when using SNP panels in diversity studies
Source: Springer Nature journal article supplement (doi:10.1186/s12864-017-4416-9), 2018-01-05
Supplement: MOESM3 [file 12864_2017_4416_MOESM3_ESM.pdf]

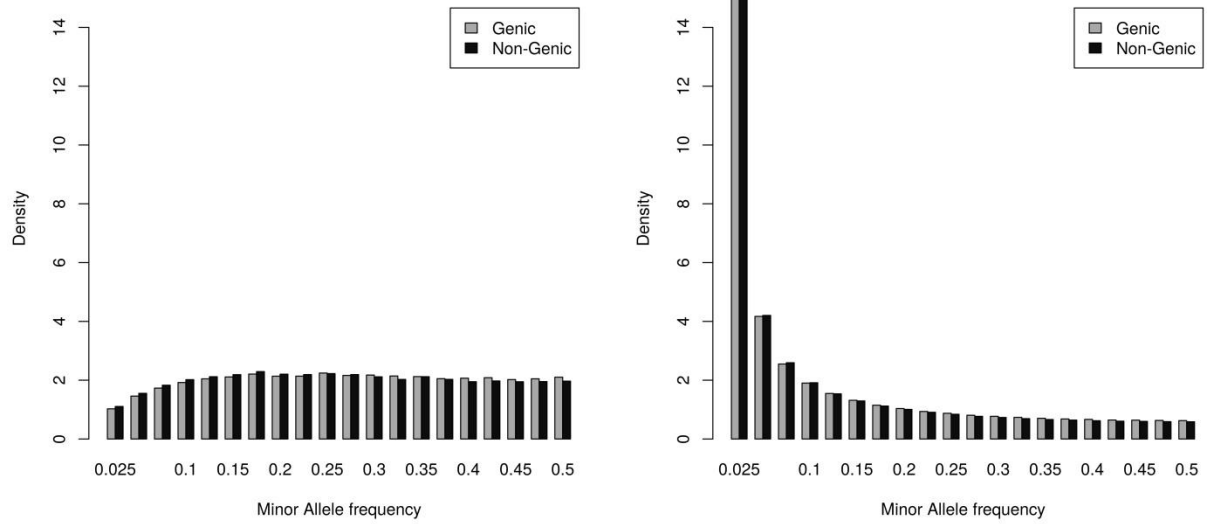

**Figure S1.** Comparison of MAF between genic and non-genic regions in array (left) and WGS (right) data.

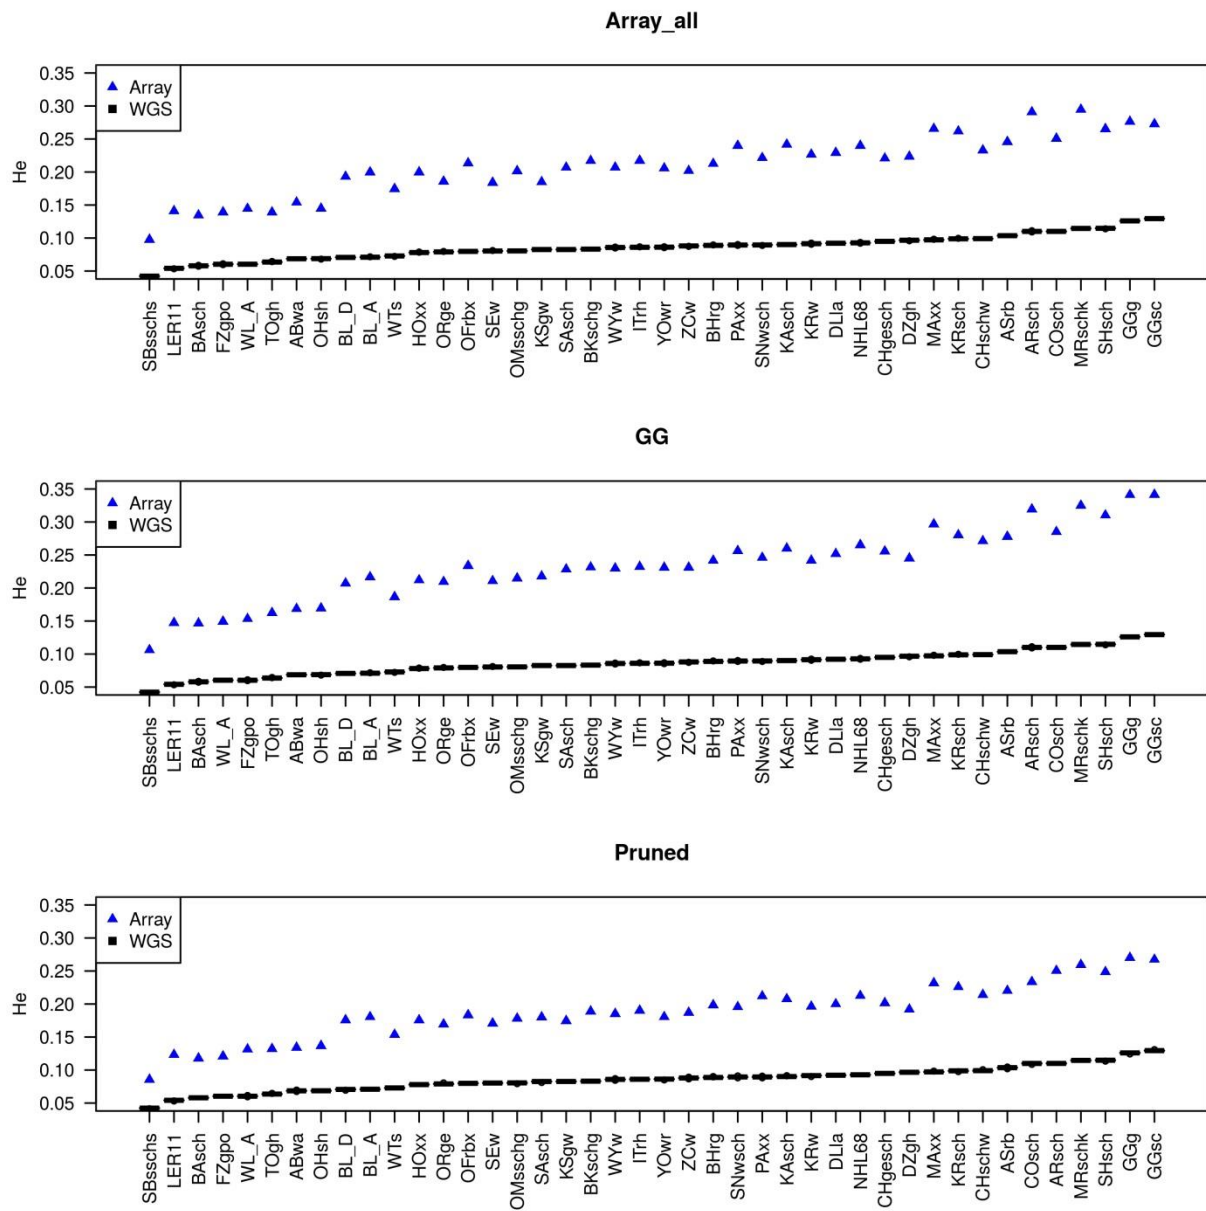

**Figure S2.** Comparisons of expected heterozygosity ( $H_e$ ) estimates between WGS (boxplot of 100 replicates) and array (Array\_all, GG and Pruned) data, for all 42 populations.

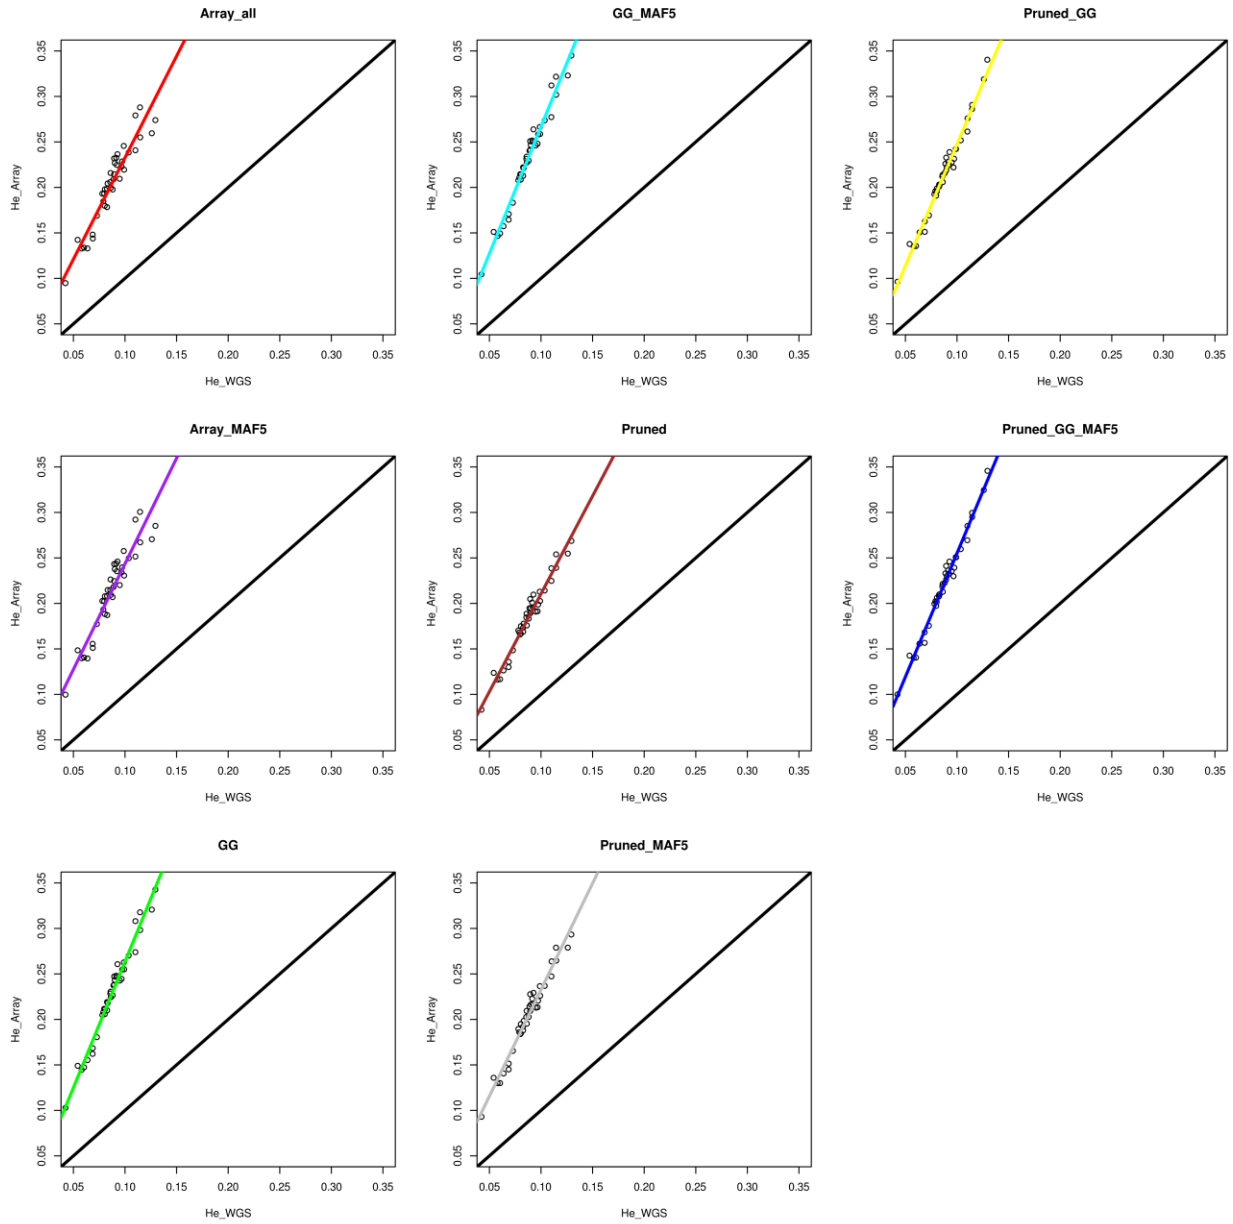

**Figure S3.** Expected heterozygosity ( $H_e$ ) estimated with array vs. WGS data for the 39 populations.

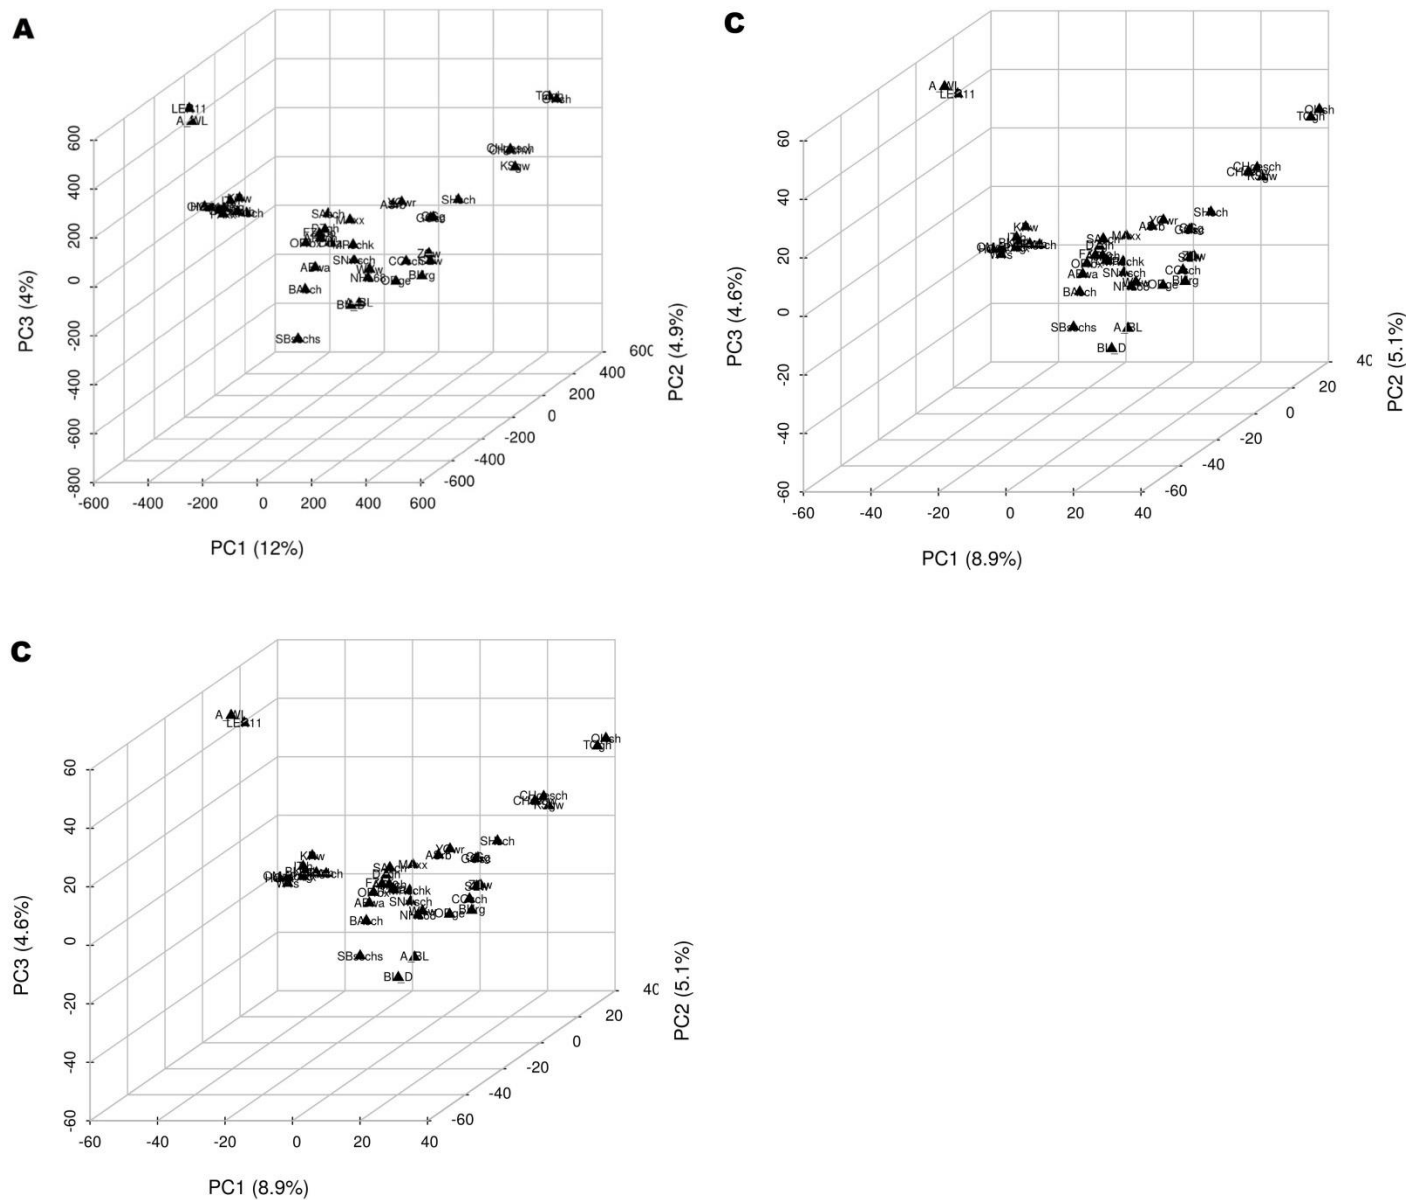

**Figure S4.** Three dimensional PCA plot of A) WGS, B) GG and C) Pruned array data.
